# Supplementary material for: Untargeted Metabolomic Analyses and Antilipidemic Effects of Citrus Physiological Premature Fruit Drop
Source: MDPI journal article supplement (doi:10.3390/ijms25031876), 2024-02-04
Supplement: s1 [file s1]

## Supplementary materials

# Untargeted Metabolomic Analyses and Antilipidemic Effects of Citrus Physiological Premature Fruit Drop

Chao Wang <sup>1,2</sup>, Mingfang Peng <sup>1,2</sup>, Zhipeng Gao <sup>3</sup>, Qi Han <sup>4</sup>, Fuhua Fu <sup>1,2</sup>, Gaoyang Li <sup>1,2</sup>, Donglin Su <sup>1,2</sup>, Lvhong Huang <sup>2</sup>, Jiajing Guo <sup>2,\*</sup> and Yang Shan <sup>1,\*</sup>

<sup>1</sup> Longping Branch, College of Biology, Hunan University, Changsha 410125, China

<sup>2</sup> Hunan Agriculture Product Processing Institute, Dongting Laboratory, Hunan Provincial Key Laboratory of Fruits & Vegetables Storage, Processing, Quality and Safety, Hunan Academy of Agricultural Sciences, Changsha 410125, China

<sup>3</sup> Fisheries College, Hunan Agricultural University, Changsha 410128, China

<sup>4</sup> College of Animal Science and Technology, Hunan Agricultural University, Changsha 410128, China

\* Correspondence: guojiajing1986@163.com (J.G.); sy6302@sohu.com or sy6302@hnu.edu.cn (Y.S.); Tel.: +86-(0)731-8469-8915 (J.G.); +86-(0)731-8469-1289 (Y.S.)

**Total Pages: 2; Total Figures:2**

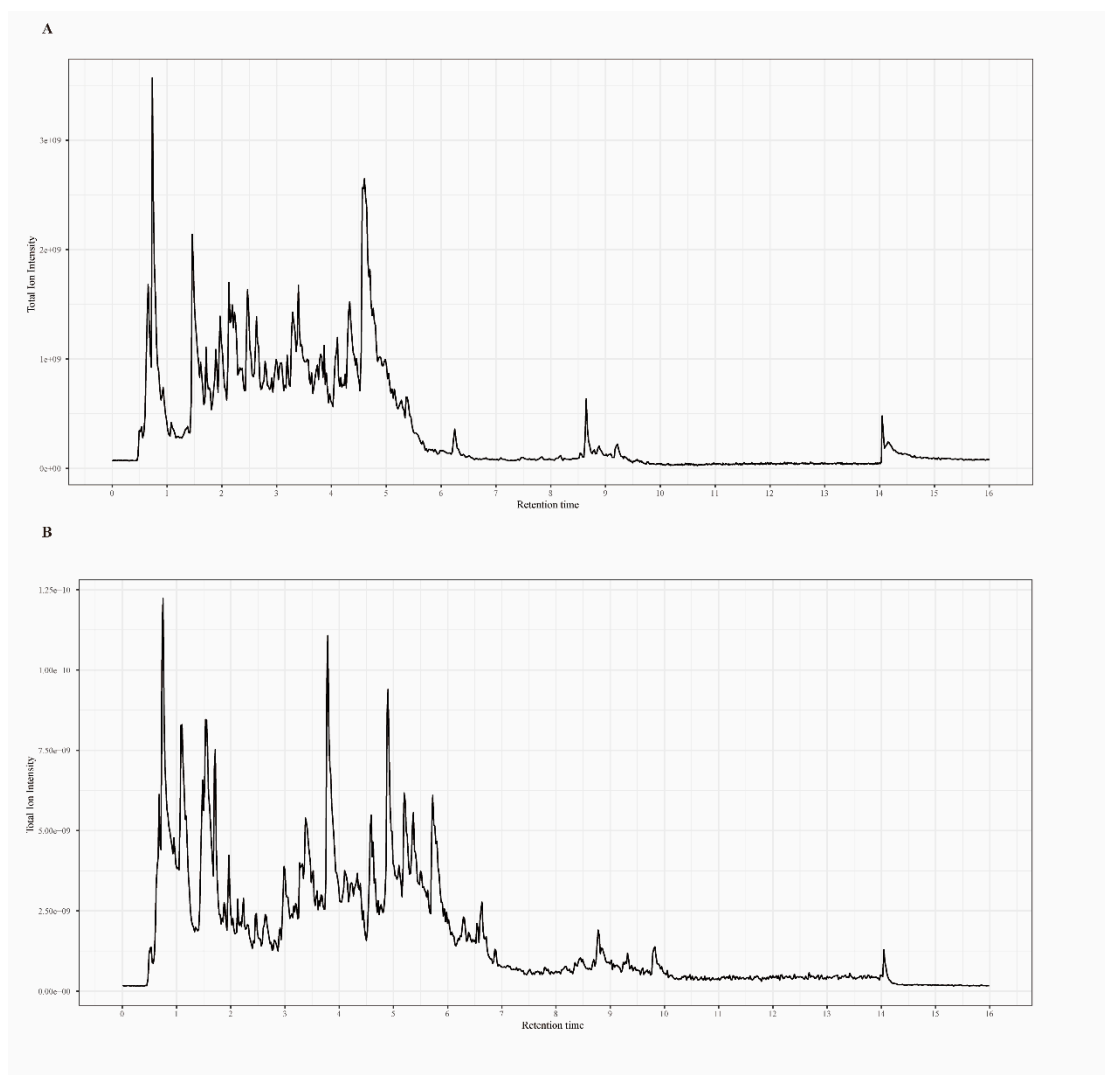

Figure S1. Total ion current (TIC) chromatograms of *Citrus aurantium* L. 'Daidai' physiological premature fruit drop. **(A)** negative mode. **(B)** positive mode.

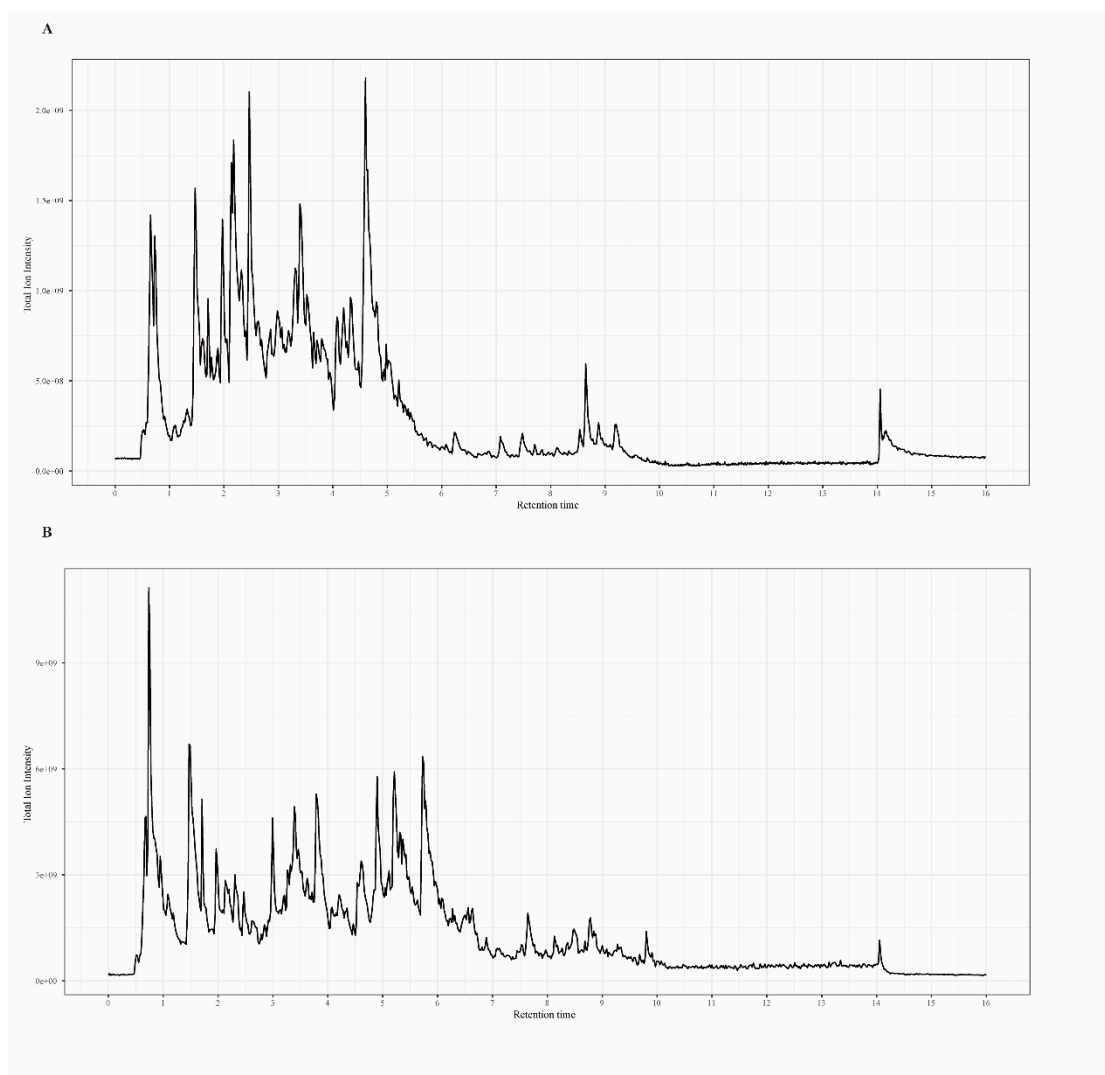

Figure S2. Total ion current chromatograms of *Citrus aurantium* 'Changshan-huyou' physiological premature fruit drop. **(A)** negative mode. **(B)** positive mode.
